# Supplementary material for: Tailoring a multifunctional magnetic cationic metal–organic framework composite for synchronous enrichment of phosphopeptides/glycopeptides
Source: Royal Society of Chemistry journal article supplement (doi:10.1039/d2tb00057a), 2022-01-01
Supplement: d2tb00057a1.pdf [file d2tb00057a1.pdf]

## Electronic Supplementary Information

### Tailoring multifunctional magnetic cationic metal-organic framework composites for synchronous enrichment of glycopeptides and phosphopeptides

He Qi<sup>a</sup>, Zheng Li<sup>a</sup>, Jiutong Ma<sup>a</sup>, Qiong Jia<sup>a,b,\*</sup>

<sup>a</sup> College of Chemistry, Jilin University, Changchun 130012, China

<sup>b</sup> Key Laboratory for Molecular Enzymology and Engineering of Ministry of Education, College of Life Sciences, Jilin University, Changchun 130012, China

#### Table of contents

##### Supplementary Experimental Section

|                                                                      |      |
|----------------------------------------------------------------------|------|
| Regents and materials.....                                           | SI-2 |
| Characterization.....                                                | SI-2 |
| Preparation of Fe <sub>3</sub> O <sub>4</sub> nanoparticles.....     | SI-2 |
| Preparation of 1,3-bis(4-carboxybutyl)imidazolium bromide (ILI)..... | SI-3 |
| Sample preparation.....                                              | SI-3 |
| MS analysis.....                                                     | SI-3 |

##### Supplementary Figures

|              |      |
|--------------|------|
| Fig. S1..... | SI-4 |
| Fig. S2..... | SI-4 |
| Fig. S3..... | SI-5 |
| Fig. S4..... | SI-5 |

##### Supplementary Tables

|               |       |
|---------------|-------|
| Table S1..... | SI-6  |
| Table S2..... | SI-7  |
| Table S3..... | SI-7  |
| Table S4..... | SI-8  |
| Table S5..... | SI-9  |
| Table S6..... | SI-10 |
| Table S7..... | SI-11 |
| Table S8..... | SI-14 |

---

\* Corresponding author.  
E-mail address: jiaqiong@jlu.edu.cn

## Supplementary Experimental Section

### Reagents and materials

Iron trichloride ( $\text{FeCl}_3 \cdot 6\text{H}_2\text{O}$ ), zinc nitrate hexahydrate ( $\text{Zn}(\text{NO}_3)_2 \cdot 6\text{H}_2\text{O}$ ), sodium citrate tribasic dehydrate ( $\text{Na}_3\text{Cit} \cdot 2\text{H}_2\text{O}$ ), ammonium bicarbonate ( $\text{NH}_4\text{HCO}_3$ ), sodium acetate (NaAc), ethylene glycol (EG), concentrated hydrochloric acid (37%), ethanol (EtOH), and methanol (MeOH) were obtained from Sinopharm Chemical Reagent Co., Ltd (Shanghai, China). Methyl 4-bromobutyrate, 1-(trimethylsilyl)imidazole, titanium tetrafluoride ( $\text{TiF}_4$ ), acetonitrile (ACN), urea, odoacetamide (IAA), trifluoroacetic acid (TFA), dithiothreitol (DTT), phosphoric acid ( $\text{H}_3\text{PO}_4$ ), and formic acid (FA) were secured from Aladdin Reagents (Shanghai, China). Horseradish peroxidase (HRP), bovine serum albumin (BSA), trypsin,  $\beta$ -casein, and 2,5-dihydroxybenzoic acid (DHB) were acquired from Sigma-Aldrich (St. Louis, MO, USA). Human serum and saliva samples were obtained from China-Japan Hospital of Jilin University (Changchun, China) according to standard clinical procedures.

### Characterization

The morphologies of as-prepared materials were determined using an SU8020 ESEM microscope (Hitachi, Japan) and Hitachi H600 microscope (Hitachi, Japan). Brunauer-Emmett-Teller (BET) surface areas were determined with an ASAP 2420 gas adsorption instrument (Micromeritics, Atlanta, USA). Powder X-ray diffraction (PXRD) patterns were recorded in the range of  $2\theta = 5\text{--}80^\circ$  using a D/Max-III C instrument (Rigaku, Japan) with Cu  $K\alpha$  radiation. Thermogravimetric analysis (TGA) was taken with a Q500 thermal gravimetric analyzer (TA, USA). Fourier-transform infrared (FT-IR) spectra were obtained using a Thermo Nicolet 670 FT-IR instrument (Thermo Nicolet Corporation, USA) with the recorded range of  $4000\text{--}450\text{ cm}^{-1}$ . The magnetic properties were determined by a vibrating sample magnetometer (VSM) on a Superconducting Quantum Interference Device (SQUID XL-7, Quantum Design, USA). Zeta potential was calculated *via* dynamic light scattering (DLS, Zeta-sizer Nano ZS90, Malvern Company, USA). Mass spectra were obtained on a MALDI-TOF/TOF 5800 instrument (Applied Biosystems, Foster City, CA).

### Preparation of $\text{Fe}_3\text{O}_4$ nanoparticles

3.24 g  $\text{FeCl}_3 \cdot 6\text{H}_2\text{O}$  and 0.6 g  $\text{Na}_3\text{Cit} \cdot 2\text{H}_2\text{O}$  were dissolved into 50 mL EG and ultrasonically treated for 30 min to form yellow solution. Then, 3.6 g NaAc was added and the mixture was stirred for another 30 min to obtain a uniform brown solution. The above solution was transferred and sealed in a Teflon-lined stainless-steel autoclave. After heating at  $200\text{ }^\circ\text{C}$  for 12 h, taupe precipitates were obtained and washed with EtOH and  $\text{H}_2\text{O}$ .

### Preparation of 1,3-bis(4-carboxybutyl)imidazolium bromide (ILI)

4.4 g 1-(trimethylsilyl)imidazole and 11.3 g methyl 4-bromobutyrate (11.3 g, 62.6 mmol) were mixed in a round-bottom flask. After agitating for 24 h at 60 °C under the protection of Ar, the product was thoroughly rinsed with ether for the purpose of discarding the excess reactants and 1,3-bis(4-methyl butyrate)imidazolium bromide was obtained. The obtained intermediate products were further dispersed into 7 mL concentrated hydrochloric acid followed by refluxing at 100 °C for 2 h to hydrolyze the diester groups. After washing by ether and acetone for three times sequentially, ILI was obtained.

### Sample preparation

Standard proteins were dissolved in 50 mM  $\text{NH}_4\text{HCO}_3$  (pH 8.3) to prepare 1 mg  $\text{mL}^{-1}$  sample solution. Then, the samples were heated to 100 °C and kept for 10 min to denature proteins. The denatured proteins were cooled to room temperature and trypsin was added to proteins solution with the mass ratio of 1:30 (*w/w*). Finally, the mixture was incubated at 37 °C for 18 h, followed by adding certain amount of FA to quench the digestion process. As for biological fluids like human serum and saliva, 50  $\mu\text{L}$  of stock solution was diluted to 500  $\mu\text{L}$  with 0.2% TFA. Then, the diluted biological fluids were stored at -20 °C for further use. For phosphopeptides identification from human serum digest, the eluent were collected and freeze-dried. Subsequently, lyophilized peptide sample were dispersed into 25 mM  $\text{NH}_4\text{HCO}_3$  and incubated with certain PNGase F for 3 h to remove poly-saccharides. After that, the sample were freeze-dried and cryopreserved for LC-MS/MS analysis.

### MS Analysis

0.5  $\mu\text{L}$  eluent was mixed with 0.5  $\mu\text{L}$  DHB (20 mg  $\text{mL}^{-1}$  in 70% ACN- $\text{H}_2\text{O}$  + 1%  $\text{H}_3\text{PO}_4$ ) on the MALDI plate and dried at room temperature. MALDI-TOF MS instrument (Model 5800, Applied Biosystems, Foster City, CA) was operated in the linear positive-ion mode with the *m/z* scan range of 1000–5000 for glycopeptides and 1000–3500 for phosphopeptides.

Serum sample was separated by Easy-nLC HPLC system with nanoliter flow rate. Buffer A was 0.1% FA- $\text{H}_2\text{O}$  (*v/v*) and B was 0.1% FA-84%ACN (*v/v*). The gradient elution condition was set as follows: 5-35% B for 22.00 min, 35-100% B for 5 min and 100% B for 3 min. Q-Exactive mass spectrometry was performed with positive ion mode. The full-scan MS ranged from 300-1800 *m/z*. Resolution: 70000 at 200 *m/z*; AGC target:  $1\text{e}^6$ ; Maximum IT: 40 ms; Number of scan ranges: 1; Dynamic exclusion: 30.0 s. MS/MS data was collected as follows: 20 fragmentation patterns (MS2 scan) were acquired of after each full scan. Resolution: 17500 at 200 *m/z*; Activation

type: Higher energy collision induced dissociation (HCD); Normalized collision energy: 27 eV; Isolation window: 2 m/z; Microscans: 1; Maximum IT: 50 ms. MS raw files were analyzed by Proteome Discoverer 1.4 software with the database of uniprot\_Homo\_sapiens\_203800\_20220104.fasta for identifying phosphopeptides and glycopeptides from human serum tryptic digest.

## Supplementary Figures

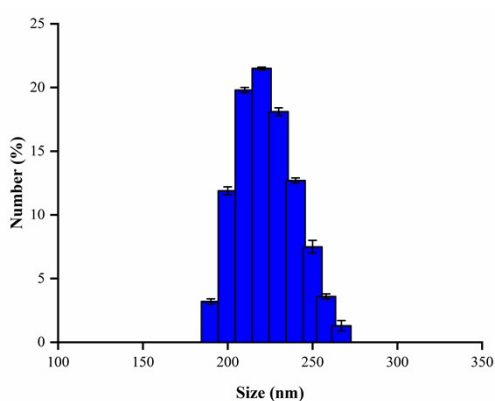

**Fig. S1** DLS histogram of  $\text{Fe}_3\text{O}_4@ILI-01@Ti^{4+}$ .

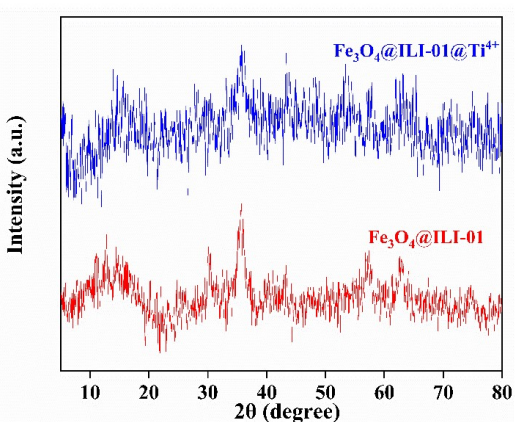

**Fig. S2** XRD patterns of  $\text{Fe}_3\text{O}_4@ILI-01$  and  $\text{Fe}_3\text{O}_4@ILI-01@Ti^{4+}$ .

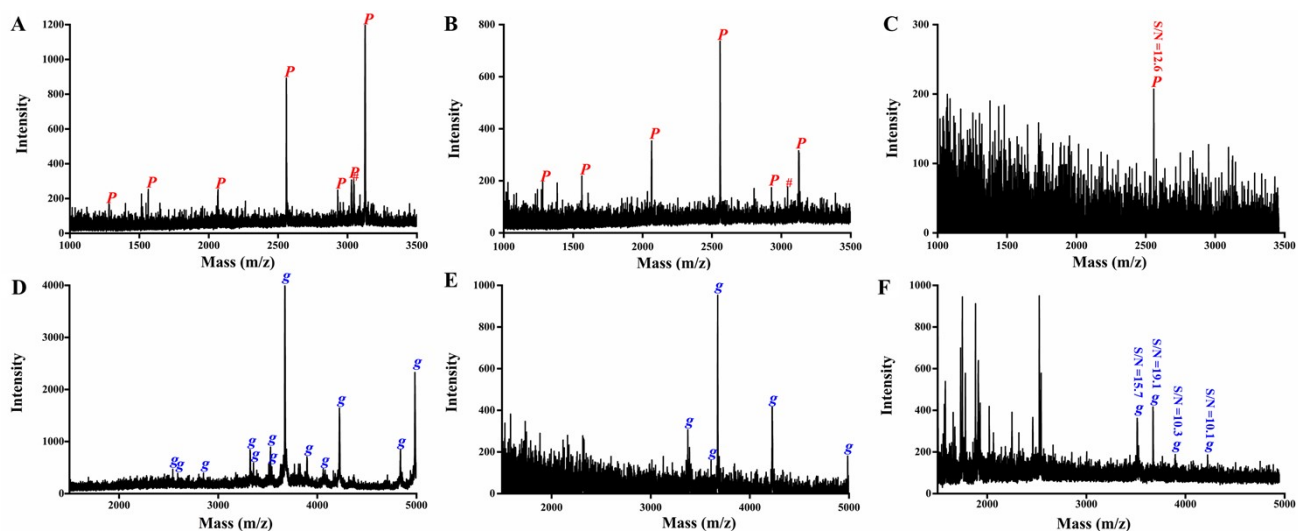

**Fig. S3** MALDI-TOF mass spectrum of  $\beta$ -casein digests with various concentrations: (A) 10 fmol, (B) 1 fmol, and (C) 0.5 fmol. MALDI-TOF mass spectrum of HRP digests with various concentrations: (D) 10 fmol, (E) 0.5 fmol, and (F) 0.1 fmol.

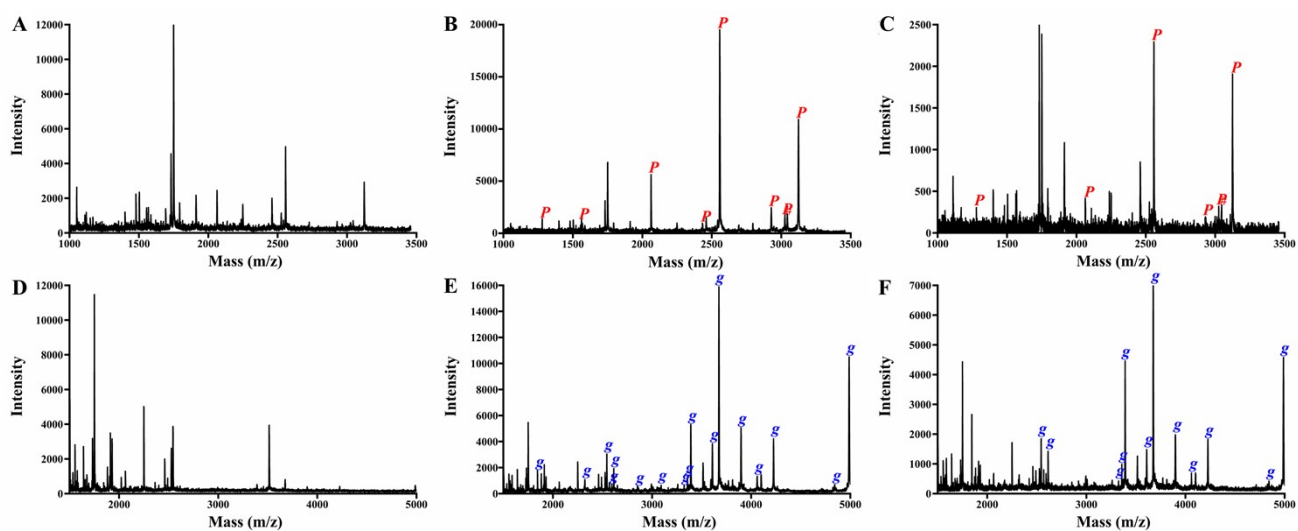

**Fig. S4** MALDI-TOF mass spectrum of  $\beta$ -casein and BSA tryptic digests mixture with various mass ratios: (A) without enrichment, (B) 1:500, and (C) 1:5000. MALDI-TOF mass spectrum of HRP and BSA tryptic digests mixture with various mass ratios: (D) without enrichment, (E) 1:100, and (F) 1:500.

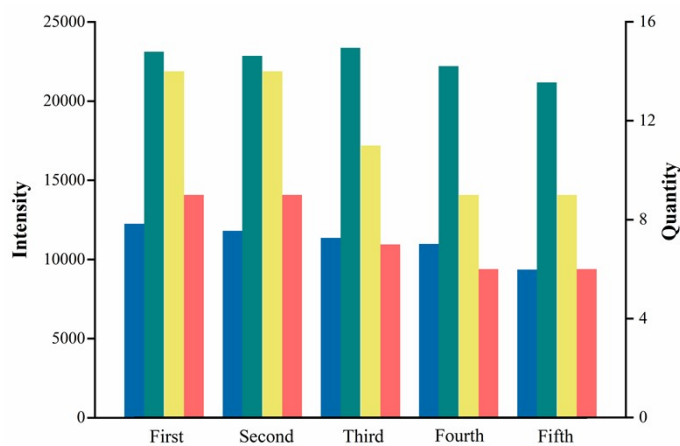

**Fig. S5** Intensity and quantity of the glycopeptides/phosphopeptides simultaneously enriched during five repeated enrichment-elution processes: (Blue) highest intensity of glycopeptides, (Green) highest intensity of phosphopeptides, (Yellow) quantity of glycopeptides, and (Orange) quantity of phosphopeptides.

## Supplementary Tables

**Table S1.** Detailed information of identified phosphopeptides or glycopeptides enriched from  $\beta$ -casein or HRP digests by  $\text{Fe}_3\text{O}_4@ \text{ILI-01} @ \text{Ti}^{4+}$ . [pS]:phosphorylation site. N#: N-glycosylation site.

| Peak       | Observed $m/z$  | Phosphoryl groups | Peptide sequence                        |
|------------|-----------------|-------------------|-----------------------------------------|
| $\beta_1$  | 1031.5          | 1                 | FQ[pS]EEQQQTEDELQDK                     |
| $\beta_2$  | 1278.6          | 1                 | FQ[pS]EEQQQTEDELQDKIHPF                 |
| $\beta_3$  | 1562.3          | 4                 | RELEELNVPGEIVESL[pS] [pS] [pS]EE[pS]ITR |
| $\beta_4$  | 2061.8; 1981.4# | 1                 | FQ[pS]EEQQQTEDELQDK                     |
| $\beta_5$  | 2432.4          | 1                 | IEKFQ[pS]EEQQQTEDELQDK                  |
| $\beta_6$  | 2556.4; 2480.5# | 1                 | FQ[pS]EEQQQTEDELQDKIHPF                 |
| $\beta_7$  | 2927.2          | 4                 | RELEELNVPGEIVE[pS]L[pS][pS][pS]EESITR   |
| $\beta_8$  | 3027.1          | 4                 | RELEELNVPGEIVE[pS]L[pS][pS][pS]EESITR   |
| $\beta_9$  | 3122.2; 3042.5# | 4                 | RELEELNVPGEIVE[pS]L[pS][pS][pS]EESITR   |
| $\alpha_1$ | 1660.9          | 1                 | VPQLEIVPN[pS]AEER                       |
| $\alpha_2$ | 1951.1          | 1                 | YKVPQLEIVPN[pS]AEER                     |

  

| Peak | Observed $m/z$ | Glycan composition                                                                      | Amino acid sequence              |
|------|----------------|-----------------------------------------------------------------------------------------|----------------------------------|
| H1   | 1842.0         | XylMan <sub>3</sub> FucGlcNAc <sub>2</sub>                                              | NVGLN#R                          |
| H2   | 2319.2         | Man <sub>3</sub> GlcNAc <sub>2</sub>                                                    | PTLN#TTYLQTLR                    |
| H3   | 2539.7         | XylMan <sub>3</sub> GlcNAc <sub>2</sub> Fuc                                             | SSPN#ATDTIPLVR                   |
| H4   | 2590.9         | XylMan <sub>3</sub> FucGlcNAc <sub>2</sub>                                              | PTLN#TTYLQTLR                    |
| H5   | 2611.2         | XylMan <sub>3</sub> GlcNAc <sub>2</sub>                                                 | MGN#ITPLTGTQGQIR                 |
| H6   | 2707.7         | XylMan <sub>2</sub> GlcNAc <sub>2</sub>                                                 | SFAN#STQTFNFVAFVEAMDR            |
| H7   | 2850.3         | FucGlcNAc                                                                               | GLIQSDQELFSSPN#ATDTIPLVR         |
| H8   | 3074.3         | FucGlcNAc <sub>2</sub>                                                                  | LHFHDCFVNGCDASILLDN#TTSFR        |
| H9   | 3088.8         | XylMan <sub>3</sub> FucGlcNAc <sub>2</sub>                                              | GLCPLNGN#LSALVDFDLR              |
| H10  | 3222.0         | Man <sub>3</sub> FucGlcNAc <sub>2</sub>                                                 | SFAN#STQTFNFVAFVEAMDR            |
| H11  | 3321.6         | XylMan <sub>3</sub> GlcNAc <sub>2</sub> Fuc                                             | QLTPTFYDNNSCPN#VSNIVR            |
| H12  | 3354.3         | XylMan <sub>3</sub> GlcNAc <sub>2</sub> Fuc                                             | SFAN#STQTFNFVAFVEAMDR            |
| H13  | 3371.1         | XylMan <sub>3</sub> FucGlcNAc <sub>2</sub>                                              | LYN#FSNTGLPDPTLN#TTYLQTLR        |
| H14  | 3388.4         | XylHex <sub>6</sub> HexNAc <sub>4</sub> Fuc <sub>2</sub>                                | DSFRNVGLN#R                      |
| H15  | 3509.5         | XylMan <sub>2</sub> FucGlcNAc <sub>2</sub>                                              | GLIQSDQELFSSPN#ATDTIPLVR         |
| H16  | 3526.4         | XylMan <sub>3</sub> GlcNAc <sub>2</sub>                                                 | GLIQSDQELFSSPN#ATDTIPLVR         |
| H17  | 3539.8         | Man <sub>3</sub> FucGlcNAc <sub>2</sub>                                                 | GLIQSDQELFSSPN#ATDTIPLVR         |
| H18  | 3605.7         | XylMan <sub>3</sub> GlcNAc <sub>2</sub> Fuc                                             | NQCRGLCPLNGN#LSALVDFDLR          |
| H19  | 3672.2         | XylMan <sub>3</sub> GlcNAc <sub>2</sub> Fuc                                             | GLIQSDQELFSSPN#ATDTIPLVR         |
| H20  | 3894.0         | XylMan <sub>3</sub> GlcNAc <sub>2</sub> Fuc                                             | LHFHDCFVNGCDASILLDN#TTSFR        |
| H21  | 4056.9         | XylMan <sub>4</sub> GlcNAc <sub>2</sub> Fuc                                             | QLTPTFYDNNSC(AAVESACPR)PN#VSNIVR |
| H22  | 4223.0         | XylMan <sub>3</sub> GlcNAc <sub>2</sub> Fuc                                             | QLTPTFYDNNSC(AAVESACPR)PN#VSNIVR |
| H23  | 4822.9         | XylMan <sub>2</sub> FucGlcNAc <sub>2</sub> ,<br>XylMan <sub>2</sub> GlcNAc <sub>2</sub> | LYN#FSNTGLPDPTLN#TTYLQTLR        |
| H24  | 4839.7         | XylMan <sub>3</sub> FucGlcNAc <sub>2</sub> ,<br>XylMan <sub>3</sub> GlcNAc <sub>2</sub> | LYN#FSNTGLPDPTLN#TTYLQTLR        |
| H25  | 4984.7         | XylMan <sub>3</sub> GlcNAc <sub>2</sub> Fuc                                             | LYN#FSNTGLPDPTLN#TTYLQTLR        |

**Table S2.** Corresponding comparison of sensitivity toward phosphopeptides/glycopeptides enrichment based on different materials.

| Material                                                                                     | Phosphopeptides, fmol | Glycopeptides, fmol | Ref.      |
|----------------------------------------------------------------------------------------------|-----------------------|---------------------|-----------|
| MF@PDA@UiO-66-NH <sub>2</sub>                                                                | 0.5                   | 0.5                 | 47        |
| CS@PGMA@IDA-Ti <sup>4+</sup>                                                                 | 0.1                   | 0.1                 | 48        |
| Fe <sub>3</sub> O <sub>4</sub> @SiO <sub>2</sub> @(Zr-Ti-MOF) <sub>10</sub> -NH <sub>2</sub> | 1                     | 1                   | 49        |
| SiO <sub>2</sub> -NH <sub>2</sub> @TiO <sub>2</sub>                                          | 0.16                  | 2                   | 50        |
| Fe <sub>3</sub> O <sub>4</sub> @ILI-01@Ti <sup>4+</sup>                                      | 0.5                   | 0.1                 | This work |

**Table S3.** Corresponding comparison of selectivity toward phosphopeptides/glycopeptides enrichment based on different materials.

| Material                                                                                     | Glycopeptides | Phosphopeptides | Ref.      |
|----------------------------------------------------------------------------------------------|---------------|-----------------|-----------|
| MF@PDA@UiO-66-NH <sub>2</sub>                                                                | 1:1000        | 1:200           | 47        |
| CS@PGMA@IDA-Ti <sup>4+</sup>                                                                 | 1:100         | 1:500           | 48        |
| Fe <sub>3</sub> O <sub>4</sub> @SiO <sub>2</sub> @(Zr-Ti-MOF) <sub>10</sub> -NH <sub>2</sub> | 1:50          | 1:2000          | 49        |
| SiO <sub>2</sub> -NH <sub>2</sub> @TiO <sub>2</sub>                                          | 1:500         | 1:500           | 50        |
| Fe <sub>3</sub> O <sub>4</sub> @ILI-01@Ti <sup>4+</sup>                                      | 1:500         | 1:5000          | This work |

**Table S4.** Corresponding comparison of actual samples toward phosphopeptides/glycopeptides enrichment based on different materials.

| Material                                                                                     | Serum        | Saliva        | Ref.      |
|----------------------------------------------------------------------------------------------|--------------|---------------|-----------|
| MF@PDA@UiO-66-NH <sub>2</sub>                                                                | -            | 52 GPs/41 PPs | 47        |
| CS@PGMA@IDA-Ti <sup>4+</sup>                                                                 | -            | -             | 48        |
| Fe <sub>3</sub> O <sub>4</sub> @SiO <sub>2</sub> @(Zr-Ti-MOF) <sub>10</sub> -NH <sub>2</sub> | 41 GPs-4 PPs | -             | 49        |
| SiO <sub>2</sub> -NH <sub>2</sub> @TiO <sub>2</sub>                                          | -/4 PPs      | -/17 PPs      | 50        |
| Fe <sub>3</sub> O <sub>4</sub> @ILI-01@Ti <sup>4+</sup>                                      | 37 GPs/4 PPs | 23 GPs/16 PPs | This work |

GPs: glycopeptides. PPs: phosphopeptides. – represented that data was not provided.



**Table S5.** Detailed information on identified phosphopeptides/glycopeptides enriched from human serum by Fe<sub>3</sub>O<sub>4</sub>@ILI-01@Ti<sup>4+</sup>. [pS]:phosphorylation site. N#: N-glycosylation site.

| Peak | Observed <i>m/z</i> | Amino acid sequence    |
|------|---------------------|------------------------|
| P1   | 1389                | D[pS]GEGDFLAEGGGV      |
| P2   | 1461                | AD[pS]GEGDFLAEGGGV     |
| P3   | 1545                | D[pS]GEGDFLAEGGGVR     |
| P4   | 1616                | AD[pS]GEGDFLAEGGGVR    |
| Peak | Observed <i>m/z</i> | Amino acid sequence    |
| G1   | 1076                | WVSN#KTEGR             |
| G2   | 1121                | FN#DTEVLQR             |
| G3   | 1138                | GLcVN#ASAVSR           |
| G4   | 1190                | EEQYN#STYR             |
| G5   | 1198                | KKEDALN#ETR            |
| G6   | 1226                | EN#ISDPTSPLR           |
| G7   | 1275                | AAIPSALDTN#SSK         |
| G8   | 1364                | HIPGLIHN#MTAR          |
| G9   | 1372                | VVN#STTGPEHLR          |
| G10  | 1387                | GN#ETLHYETFGK          |
| G11  | 1400                | FLN#DTMAVYEAK          |
| G12  | 1405                | SWPAVGN#cSSALR         |
| G13  | 1423                | KLI N#DYVKnGTR         |
| G14  | 1435                | GTA N#TTTAGVpQR        |
| G15  | 1443                | mDGASN#VTcINSR         |
| G16  | 1490                | GAFISN#FSmTVDGK        |
| G17  | 1494                | N#LSmPLLPA DFHK        |
| G18  | 1512                | AEPPLN#ASASDQGEK       |
| G19  | 1530                | YDFN#SSMLYSTAK         |
| G20  | 1548                | YDFN#SSmLYSTAK         |
| G21  | 1554                | KLPPGLLAN#FTLLR        |
| G22  | 1598                | KNAHGEEKEN#LTAR        |
| G23  | 1613                | FVEGSHN#STVSLTK        |
| G24  | 1628                | LN#DSIQTLVNDNQR        |
| G25  | 1640                | TKPREEQFN#STFR         |
| G26  | 1657                | TKPREEQFN#STYR         |
| G27  | 1677                | TKPREEQYN#STYR         |
| G28  | 1699                | YKGLN#LTEDTYKPR        |
| G29  | 1714                | QVHFFVN#ASDVDNVK       |
| G30  | 1817                | CATPHGDN#ASLEATFVK     |
| G31  | 1911                | QDQCIYN#TTYLNVQR       |
| G32  | 2037                | VVLHPN#YSQVDIGLIKLK    |
| G33  | 2044                | AN#PTVTLFPPSSEELQANK   |
| G34  | 2087                | SEGSSVN#LSPPLEQCV PDR  |
| G35  | 2164                | VSN#QTL SLFFT VLQDVPVR |
| G36  | 2229                | TLN#QSSDELQLSmGNAMFVK  |
| G37  | 2273                | TVLTPATNHmGN#VTFTIPANR |

**Table S6.** Detailed information on identified phosphopeptides and glycopeptides enriched from human saliva by Fe<sub>3</sub>O<sub>4</sub>@ILI-01@Ti<sup>4+</sup>. [pS]:phosphorylation site. N#: N-glycosylation site.

| Peak | Observed <i>m/z</i> | Amino acid sequence                |
|------|---------------------|------------------------------------|
| P1   | 1001.3              | [pS]EEKFLR                         |
| P2   | 1021.0              | ItFYEDR                            |
| P3   | 1076.2              | [pS]SEEKFLR                        |
| P4   | 1136.9              | GK[pS]PPPEFAK                      |
| P5   | 1154.8              | [pS][pS]EEKFLR                     |
| P6   | 1214.8              | LN[pS]EGMEEAR                      |
| P7   | 1233.0              | [pS]EQFIDEER                       |
| P8   | 1270.8              | D[pS][pS]EEKFLR                    |
| P9   | 1312.8              | [pS][pS]EEKFLRR                    |
| P10  | 1426.8              | D[pS][pS]EEKFLRR                   |
| P11  | 1443.6              | GILAADESVG[pS]mAK                  |
| P12  | 1471.4              | DVnSS[pS]PVMLAFK                   |
| P13  | 1539.5              | FGQG[pS]GPIVLDDVR                  |
| P14  | 1663.6              | SDGGD[pS]EQFIDEER                  |
| P15  | 1752.2              | QPPQ[pS]StMGymGSQ                  |
| P16  | 1900.5              | GPPGSRG[pS]PGAPGPPGPPGSH           |
| Peak | Observed <i>m/z</i> | Amino acid sequence                |
| G1   | 1166.7              | GPPPQEGN#KSR                       |
| G2   | 1222.8              | DAGVVcTN#ETR                       |
| G3   | 1337.5              | N#LTSLTESVDR                       |
| G4   | 1395.2              | KPERPPPQGGN#QS                     |
| G5   | 1524.3              | LVNLN#SSYGLcAGR                    |
| G6   | 1572.6              | N#HScEPcQTLAVR                     |
| G7   | 1664.0              | HYTN#SSQDVTVPcR                    |
| G8   | 1677.2              | KPEGPPPQEGN#KS RSA                 |
| G9   | 1732.8              | RPGKPEGPPPQGGN#QSQ                 |
| G10  | 1769.2              | PPQGGN#KSQGPPPPGK PQ               |
| G11  | 1856.0              | AAGAN#GSADDS PGHVPVPGA             |
| G12  | 1867.6              | VVLLDPKPVAN#VTcV NK                |
| G13  | 1933.1              | AGPPGPAGPAGPPGPIGN#VGAPGA          |
| G14  | 2030.6              | PGPPGLPGPQGPKGN#GSTGPAG            |
| G15  | 2083.1              | KPEGPPPQGGN#QSQGPPPRPG             |
| G16  | 2161.7              | GPPPHPGKPEGPPPQEGN#KSR             |
| G17  | 2246.9              | PPQGGN#KSQGPPPPGK PQGPP PQ         |
| G18  | 2488.0              | GKPEGPPPQGGN#QSQGPPPRPGKPE         |
| G19  | 2526.3              | QIGLYPVLVIDSSGYVNP N#YTGR          |
| G20  | 2723.1              | SPPGK PQGPPPQGGN#QPQ GPPPPGK PQ    |
| G21  | 2795.0              | DLMLLQLDREAN#LTSSVTILPLPLQ         |
| G22  | 2879.7              | GPPPPPGK PQGPPPQGGN#KSQ GPPPPGK PQ |
| G23  | 2913.4              | NVVDGQPFTN WYDN#GSNQVAFGRGNR       |

**Table S7** LC-MS/MS identification results of phosphopeptides from tryptic digest of human serum after enrichment by Fe<sub>3</sub>O<sub>4</sub>@ILI-01@Ti<sup>4+</sup>.

| Index | Protein ID | Peptides Sequence           |
|-------|------------|-----------------------------|
| 1     | P04114     | R.VRES#DEETQIK.V            |
| 2     | P02768     | K.T#CVADESAENCDKSLHTLFGDK.L |
| 3     | P02768     | K.TCVADES#AENCDK.S          |
| 4     | P02768     | R.YT#KKVPQVSTPTLVEVSR.N     |
| 5     | P02768     | R.Y#TKKVPQVSTPTLVEVSR.N     |
| 6     | P02647     | R.THLAPYS#DELR.Q            |
| 7     | P00747     | K.KQLGAGS#IEECAAK.C         |
| 8     | P00747     | K.QLGAGS#IEECAAK.C          |
| 9     | P00747     | R.AFQY#HSKEQQCVIMAENR.K     |
| 10    | P00747     | R.AFQYHS#KEQQCVIMAENRK.S    |
| 11    | P01009     | K.TDTS#HHDQDHPFNK.I         |
| 12    | P01042     | K.ES#NEELTESCETK.K          |
| 13    | P01042     | K.ES#NEELTESCETKK.L         |
| 14    | P01042     | R.ETT#CSKESNEELTESCETK.K    |
| 15    | P01042     | R.ETTCS#KESNEELTESCETK.K    |
| 16    | P01042     | R.ET#TCSKESNEELTESCETK.K    |
| 17    | P01042     | R.ETTCSKES#NEELTESCETKK.L   |
| 18    | P01008     | K.KATEDEGS#EQKIPEATNR.R     |
| 19    | P02649     | R.GEVQAMLGQS#TEELR.V        |
| 20    | P02765     | K.CDS#SPDSAEDVRK.V          |
| 21    | P02765     | K.CDSSPDS#AEDVR.K           |
| 22    | A8MZA4     | K.IREQEEM*T#QEQUEEK.M       |
| 23    | O14791     | K.HLHEGAKS#ETAELKK.V        |
| 24    | O14791     | R.VTEPIS#AESGEQVER.V        |
| 25    | O14791     | VTEPISAES#GEQVER.V          |
| 26    | O15520     | K.LFS#FTK.Y                 |
| 27    | O75122     | R.KPGS#AGGPK.V              |
| 28    | O75829     | K.QSISS#KLEGK.I             |
| 29    | O95294     | M.AKS#S#SLNVR.V             |
| 30    | O95859     | K.KM*Y#SFLRGTK.Q            |
| 31    | P02647     | R.THLAPYS#DELR.Q            |
| 32    | P02652     | K.VKS#PELQAEAK.S            |
| 33    | P02671     | K.M*ADEAGS#EADHEGTHSTK.R    |
| 34    | P02671     | K.MADEAGS#EADHEGTHSTK.R     |
| 35    | P02671     | K.MADEAGS#EADHEGTHSTKR.G    |
| 36    | P02765     | K.CDSSPDS#AEDVR.K           |
| 37    | P02765     | K.CDSSPDS#AEDVRK.V          |
| 38    | P02765     | R.HTFM*GVVSLGSPS#GEVSHPR.K  |
| 39    | P02765     | R.HTFMGVVSLGSPS#GEVSHPR.K   |
| 40    | P08151     | R.RSSSSSS#ISSAYTVSR.R       |
| 41    | P08833     | K.AQETS#GEEISK.F            |

---

|    |        |                                |
|----|--------|--------------------------------|
| 42 | P12259 | R.LLSLGAGEFKS#QEHAK.H          |
| 43 | P17936 | R.YKVDYESQSTDTQNF#SESKR.E      |
| 44 | P31948 | R.EDY#RQIAK.A                  |
| 45 | P35579 | R.KGAGDGS#DEEVDGK.A            |
| 46 | P35712 | R.FENLGPQLT#GK.S               |
| 47 | P46013 | K.SSEPVVIM*KRS#LR.T            |
| 48 | P46100 | K.KIKVDS#EK.S                  |
| 49 | P48067 | R.GVKSS#GK.V                   |
| 50 | P49908 | R.DM*PAS#EDLQDLQK.K            |
| 51 | P49908 | R.DMPAS#EDLQDLQK.L             |
| 52 | P50479 | R.RPSGTGT#GPEDGRPSLGSPYGQPPR.F |
| 53 | P50479 | R.RPSGT#GTGPEDGRPSLGSPYGQPPR.F |
| 54 | P57740 | R.QS#QLVVDWLESIAK.D            |
| 55 | P61026 | K.SFENIS#K.W                   |
| 56 | P85037 | R.QS#PGPALARLEGR.E             |
| 57 | Q13103 | R.S#LGIMR.R                    |
| 58 | Q13443 | R.NFSS#CSAEDFEK.L              |
| 59 | Q13535 | R.KDAES#RR.R                   |
| 60 | Q14202 | R.KCTTPRGT#TK.V                |
| 61 | Q14515 | K.S#KEESHEQSAEQGK.S            |
| 62 | Q14515 | K.SKEES#HEQSAEQGK.             |
| 63 | Q14515 | R.AEAEENEKETA#TEDDSHHK.A       |
| 64 | Q14515 | K.SSS#QELGLK.D                 |
| 65 | Q14974 | K.T#VSPDR.L                    |
| 66 | Q2TAY7 | R.LIMQY#LK.E                   |
| 67 | Q5HYC2 | K.KS#VSKK.A                    |
| 68 | Q5SZK8 | R.EGGAPET#LLMDCK.A             |
| 69 | Q5T1R4 | R.KHS#LTK.N                    |
| 70 | Q7RTP6 | K.Y#M*ATQLLAK.F                |
| 71 | Q7Z407 | K.QRT#APK.T                    |
| 72 | Q7Z7A1 | K.VSSHSSQAT#K.D                |
| 73 | Q86V59 | MS#KT#M*AM*NLLEDWCR.G          |
| 74 | Q86YS7 | R.QSSCGVKFFCTTSIPKCY#R.A       |
| 75 | Q8N0Z2 | K.EVSKT#VVSK.T                 |
| 76 | Q8N7Z5 | R.KT#QHKR.T                    |
| 77 | Q8TCC3 | K.NIPS#VNAKLV                  |
| 78 | Q8TF74 | K.LKKVT#NINDR.S                |
| 79 | Q8WZ42 | R.QTDSTTWVELAT#T#VIR.T         |
| 80 | Q96ME7 | R.S#T#RIVGAKNSR.T              |
| 81 | Q96MT7 | R.KDGLTTRDS#ISR.S              |
| 82 | Q99578 | R.KKESM*PS#LM*EK.K             |
| 83 | Q99961 | K.LTMLNT#VSK.I                 |
| 84 | Q9BVQ7 | R.LGSAVKIS#LPDGGS#CLCT#AWPR.R  |
| 85 | Q9P270 | K.KKLT#PMQK.S                  |
| 86 | Q9UK53 | R.QFQAAS#LLTR.G                |

---

---

|     |            |                                  |
|-----|------------|----------------------------------|
| 87  | Q9UK55     | K.EEEEDEQEAS#EEK.A               |
| 88  | Q9ULH0     | R.DMGGWTALMWACY#KGR.T            |
| 89  | Q9UQ03     | K.RLLTT#GVSR.W                   |
| 90  | Q9Y485     | K.QDM*YLSS#K.E                   |
| 91  | Q9Y6W5     | K.SS#LPAVSDAR.S                  |
| 92  | A0A0A0MTS7 | K.KPEAPAVTVPEVPQEAT#EKEIPVAPPK.K |
| 93  | A0A0G2JIT5 | R.RPLS#SSAPR.D                   |
| 94  | A0A0J9YW13 | K.IISGSSGS#LLSSGSGAR.R           |
| 95  | A0A126LAY2 | K.QLS#VALNIDR.R                  |
| 96  | A0A1W2PQW7 | K.GTRES#GQKAK.T                  |
| 97  | A0A5C2GEV4 | EVQLAVS#GGGLVQPGGSLR.L           |
| 98  | A0A5C2GEX6 | DLQLVES#GGGLVKPGGSLR.L           |
| 99  | A0A5C2GF59 | K.DT#HPVTTR.G                    |
| 100 | A0A5C2GF59 | K.DT#HPVTTR.G                    |
| 101 | A0A5C2GF59 | K.DT#HPVTTR.G                    |
| 102 | A0A5C2GJK3 | K.FGTSASLAIS#GLR.S               |
| 103 | A0A5C2GLK7 | K.EVQVS#KSGGGLVQPGGSLR.L         |
| 104 | A0A5C2GQ09 | K.AVQMT#QSPSSLSASVGDR.V          |
| 105 | A0A7S5C359 | R.LSCAASGFTFT#R.Y                |
| 106 | A0A7S5C359 | R.LSCAASGFTFT#R.H                |
| 107 | A0A804HI41 | R.DPS#PVSDR.F                    |
| 108 | B2RBZ5     | R.EEEEDEQEAS#EEKAGEEEK.A         |
| 109 | D6RG00     | R.FQFIY#LNLL.-                   |
| 110 | E9PFE3     | K.KM*PT#LLPR.L                   |
| 111 | F5H618     | K.WVGSSS#.-                      |
| 112 | H0Y5I1     | R.QDAM*VVS#SRPK.A                |
| 113 | H0Y7L6     | R.X#PEKPVK.Q                     |
| 114 | H0Y7Y5     | R.AAT#FR.L                       |
| 115 | H0Y7Y5     | R.AAT#FR.L                       |
| 116 | H0YHH4     | K.XPESS#RSEASR.I                 |
| 117 | H0YJB2     | K.XT#LAPER.W                     |
| 118 | H7C1Y7     | K.T#PLKDR.G                      |
| 119 | K7ERQ3     | K.XWMLLT#GK.L                    |
| 120 | Q9NSI4     | K.SQYVPGST#MRLIKTK.S             |
| 121 | Q9NSI9     | K.LFKLES#KNR.W                   |
| 122 | S4R325     | R.QEPGGPST#R.K                   |

---

# phosphor (STY); \* Oxidation (M)

**Table S8** LC-MS/MS identification results of glycopeptides from tryptic digest of human serum after enrichment by Fe<sub>3</sub>O<sub>4</sub>@ILI-01@Ti<sup>4+</sup>.

| Index | Protein ID | Peptides Sequence                                      |
|-------|------------|--------------------------------------------------------|
| 1     | Q96K17     | LAVNNIAGIEEV <sub>n</sub> MIKDDGTVIHFNNPK              |
| 2     | Q8IVF2     | TECSTDLPPEGVPTSQAESHSGPL <sub>n</sub> SMIPVSLGQVSFPK   |
| 3     | B3KY79     | TLNETELTELQSQISDTSVVLSM <sub>n</sub> NSR               |
| 4     | P04075     | YASICQQ <sub>n</sub> GIVPIVEPEILPDGDHDLK               |
| 5     | A8MXP9     | GDADQAS <sub>n</sub> ILASFGLSAR                        |
| 6     | B3KN30     | HVMNFT <sub>n</sub> WAIASGSSTALLYSK                    |
| 7     | A0A4P8J3Z9 | I <sub>n</sub> CGGNIGSK                                |
| 8     | Q96JA1     | RAFSGLEGLEHLNLGG <sub>n</sub> AIR                      |
| 9     | P02765     | AALAAFNAQN <sub>n</sub> GSNFQLEEISR                    |
| 10    | P02765     | V <sub>c</sub> QD <sub>c</sub> PLLAPL <sub>n</sub> DTR |
| 11    | P01834     | VD <sub>n</sub> ALQSG <sub>n</sub> SQESVTEQDSK         |
| 12    | S6BAQ4     | SLSLQM <sub>Hn</sub> LR                                |
| 13    | Q9Y520     | KNADL <sub>n</sub> AQTVVK                              |
| 14    | B4DI38     | QVAYIYKCV <sub>n</sub> TTLQIK                          |
| 15    | P0DOX7     | VD <sub>n</sub> ALQSG <sub>n</sub> SQESVTEQDSK         |
| 16    | B3GQS7     | DMAIATGGAVFGEEGLT <sub>n</sub> LEDVQPHDLGK             |
| 17    | D6RBL1     | NIDQTMLSILLFFHSASGASVVAID <sub>n</sub> K               |
| 18    | P01011     | T <sub>Ln</sub> QSSDELQLSMGNAMFVK                      |
| 19    | P01011     | F <sub>n</sub> LTETSEAEIHQSFQHLLR                      |
| 20    | P01011     | KL <sub>In</sub> DYVK <sub>n</sub> GTR                 |
| 21    | E7EX73     | GGEELLPESTPIPANLSQ <sub>n</sub> LEAAAATQVAVSVPK        |
| 22    | C9JIZ6     | D <sub>n</sub> GDVCQDCIQMVTDIQTAVR                     |
| 23    | P00738     | VVLHP <sub>n</sub> YSQVDIGLIKLK                        |
| 24    | P00738     | NLFL <sub>n</sub> HSENATAK                             |
| 25    | P00738     | MVSHH <sub>n</sub> LTGATLINEQWLLTTAK                   |
| 26    | A0A2X0SFE1 | QASVAAE <sub>n</sub> SVICSFLHYMEKGGK                   |
| 27    | Q6ZTR5     | HDDDMSSSGSDTDQGCSDSP <sub>n</sub> VLHTSIK              |
| 28    | P01042     | LNAEN <sub>n</sub> ATFYFK                              |
| 29    | A0A2H4G3R8 | DYIAL <sub>n</sub> EDLSTWTAADTAAQITQR                  |
| 30    | P02749     | VYKPSAG <sub>n</sub> NSLYR                             |
| 31    | P54802     | LLLTAA <sub>Pn</sub> LTTPAFR                           |
| 32    | P25391     | TVL <sub>An</sub> VTHLLIR                              |
| 33    | P00739     | MVSHH <sub>n</sub> LTGATLINEQWLLTTAK                   |
| 34    | P00739     | NLFL <sub>n</sub> HSENATAK                             |
| 35    | P02768     | MPCAEDYLSVVL <sub>n</sub> QLCVLHEK                     |
| 36    | P02768     | ETFF <sub>n</sub> LSKR                                 |
| 37    | B4E1Z4     | QSVPAHFVAL <sub>n</sub> GSK                            |
| 38    | P01591     | IIVPLNNRE <sub>n</sub> ISDPTSPLR                       |
| 39    | P01591     | E <sub>n</sub> ISDPTSPLR                               |
| 40    | Q8IUP8     | TNGNTYMLLT <sub>n</sub> ATLDR                          |
| 41    | Q9UK55     | LPYQG <sub>n</sub> ATMLVVLMK                           |

---

|    |            |                                            |
|----|------------|--------------------------------------------|
| 42 | Q9UK55     | ETFFnLSKR                                  |
| 43 | Q9Y490     | ALCGFTEAAAQAAYLVGVSDPnSQAGQQGLVEPTQFA<br>R |
| 44 | K4DI92     | EQFMENHnPINSATSISNIISIETPNTAPSSK           |
| 45 | Q06033     | KNAHGEEKEEnLTAR                            |
| 46 | Q06033     | NAHGEEKEEnLTAR                             |
| 47 | A0A140TA32 | GHLFLQTDQPIYnPGQR                          |
| 48 | P32004     | LLFPTnSSSR                                 |
| 49 | P02751     | NSITLTnLTPGTEYVVSIVALnGR                   |
| 50 | Q13201     | FNPGAESVVLsnSTLK                           |
| 51 | O75882     | IDSTGnVTNELR                               |
| 52 | P25311     | DIVEYYnDSnGSHVLQGR                         |
| 53 | Q02985     | FVQGnSTEVACHPGYGLPK                        |
| 54 | P08603     | MDGASnVTcINSR                              |
| 55 | P08603     | SPDVInGSPISQK                              |
| 56 | F6KPG5     | SHCIAEVEEnDEMRAADLPSLAADFVESK              |
| 57 | O75882     | ISnSSDTVECECSENWK                          |
| 58 | Q8TAX7     | ITTLPhVTFLPQnATTISSR                       |
| 59 | P01877     | nFPFSQDASGDLYTTSSQLTLPATQCPDGK             |
| 60 | P01877     | TPLTAnITK                                  |
| 61 | P09871     | NCGVnCSGDVFTALIGEIASPhYPKYPEnSR            |
| 62 | A0A5F9ZH15 | NPVGLIGAEnATGETDPSHSK                      |
| 63 | B2RMS9     | LALDnGGLAR                                 |
| 64 | O75882     | IDSTGnVTNELR                               |
| 65 | O75882     | ISnSSDTVEcEcSENWK                          |
| 66 | P0CG04     | AnPTVTLFPPSSEELQANK                        |
| 67 | P05546     | nLSMPLLPADFHK                              |
| 68 | P22792     | LYLGSnnLTALHPALFQnLSK                      |
| 69 | P22792     | LsnNALSGLPQGVFGK                           |
| 70 | Q6UXB8     | SLPNFPnTSATANATGGR                         |
| 71 | P10909     | LAnLTQGEDQYYLR                             |
| 72 | P00739     | MVSHHnLTTGATLINEQWLLTTAK                   |
| 73 | P00739     | TEGDGVYTLnDKK                              |
| 74 | P43251     | FnDTEVLQR                                  |
| 75 | Q08380     | AAIPSALDTnSSK                              |
| 76 | Q08380     | ALGFEnATQALGR                              |
| 77 | P43251     | YQFNTNVVFSNnGTLVDR                         |
| 78 | Q15818     | ALPGGTDnASAASAAGGSGPQR                     |
| 79 | P10253     | GVFITnETGQPLIGK                            |
| 80 | P10253     | LEnLSSTESGYTATLTR                          |
| 81 | P32004     | VPnQTSTTLK                                 |
| 82 | P32004     | THnLTNLNPDQYR                              |
| 83 | Q9Y6R7     | VVTVAALGTnSIHKDEIGK                        |

---

n: N-glycosylation site
